# Supplementary material for: Antibiotic Capture by Bacterial Lipocalins Uncovers an Extracellular Mechanism of Intrinsic Antibiotic Resistance
Source: PubMed Central journal article supplement (PMC5350466; doi:10.1128/mbio.00225-17), 2017-03-14
Supplement: mbo002173230sf1.pdf [file mbo002173230sf1.pdf]

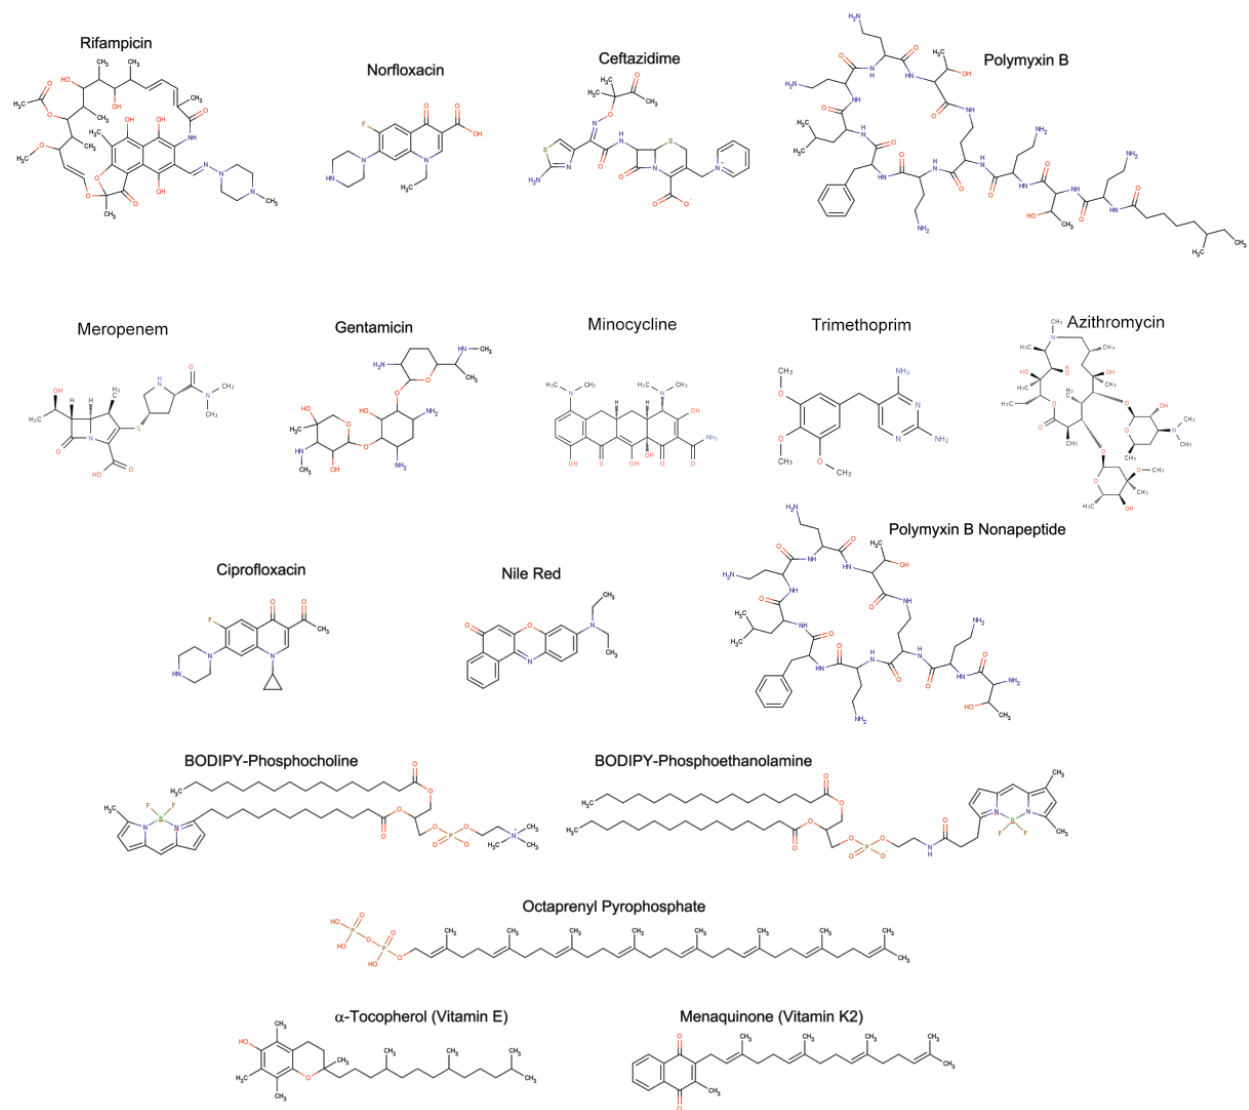

**Fig. S1.** Chemical structures of antibiotics and chemicals used in this study.
