# Supplementary material for: Antibiotic Capture by Bacterial Lipocalins Uncovers an Extracellular Mechanism of Intrinsic Antibiotic Resistance
Source: PubMed Central journal article supplement (PMC5350466; doi:10.1128/mbio.00225-17), 2017-03-14
Supplement: mbo002173230sf3.pdf [file mbo002173230sf3.pdf]

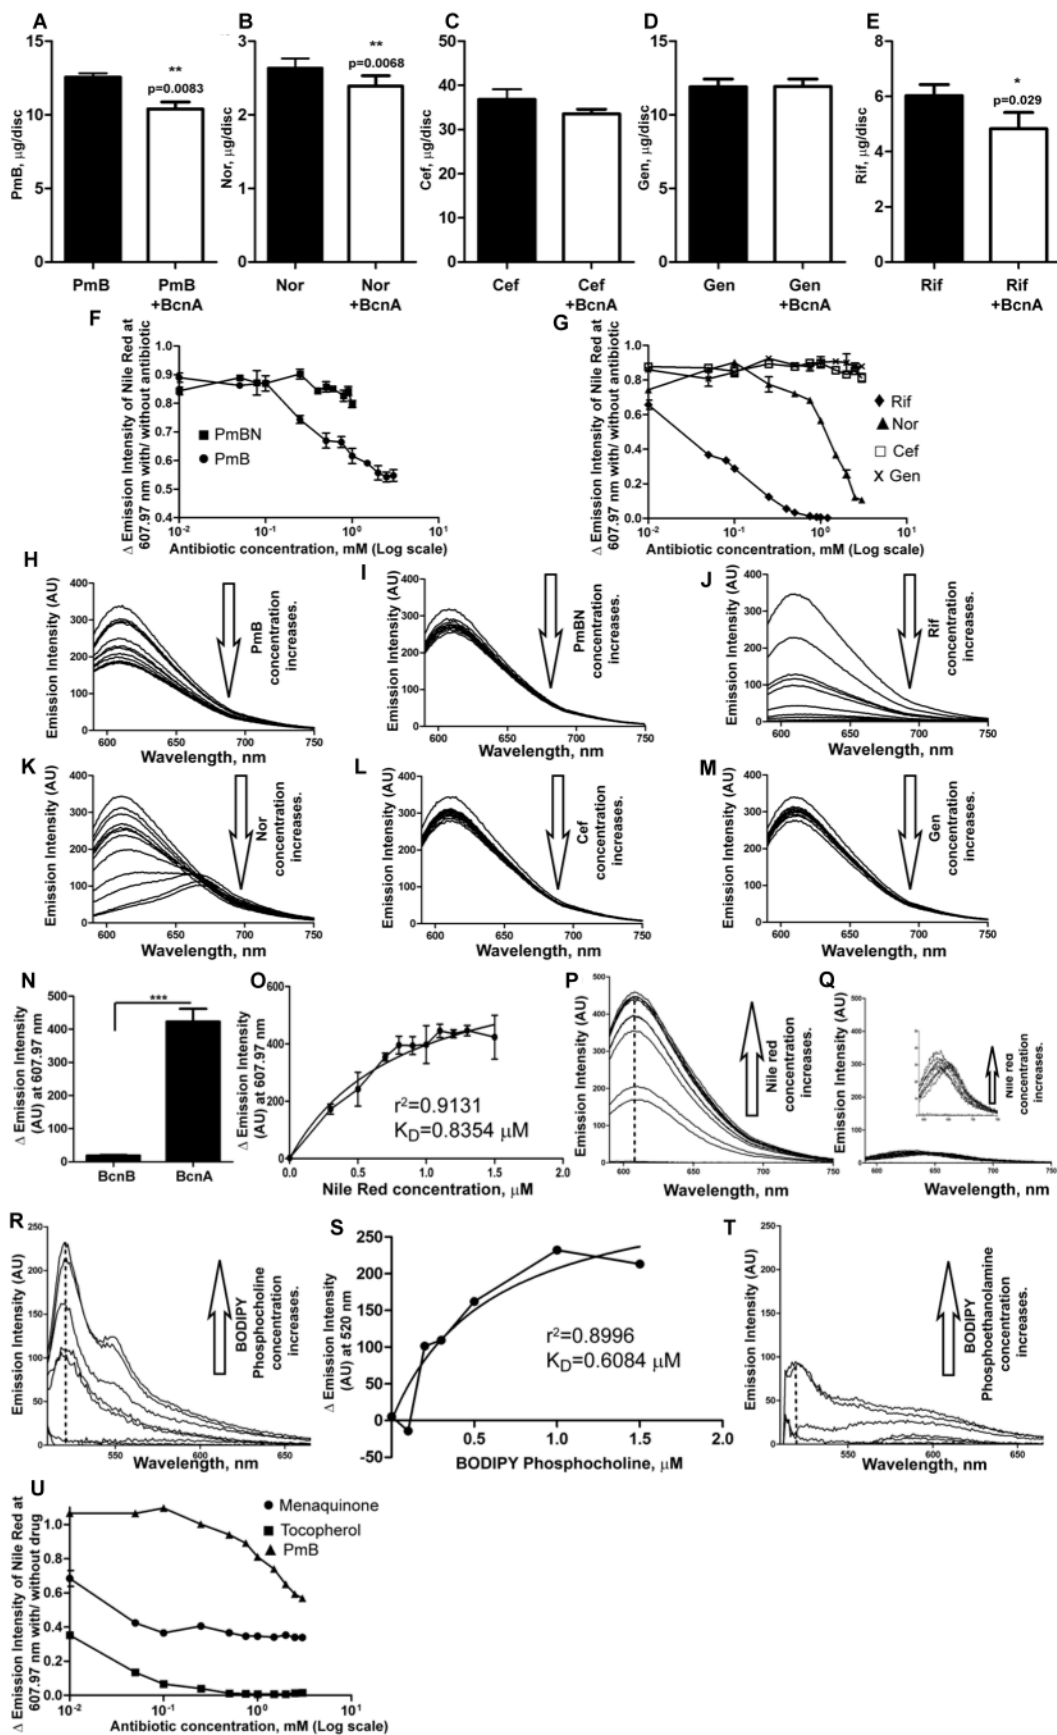

**Fig. S3. Binding Assays.** (A-E) Antibiotic bioassay results showing mean antibiotic disc contents  $\pm$ SEM following mixing with BcnA and passing through centrifugal filter units of MWCO 10 KDa compared to control antibiotic solutions. \*  $p<0.05$ ,

and \*\*  $p < 0.01$  from paired student's t-tests compared to the respective control conditions.  $n=3$  from 3 independent experiments. At this sample size, the actual power of the assay to detect statistically significant effects at significance level (alpha) of 0.05, two-tailed is  $>99\%$ . (F-G) Binding displacement assays of Nile Red from  $1.5 \mu\text{M}$  BcnA- $1.5 \mu\text{M}$  Nile Red complex by antibiotics and other chemicals. 3 independent experiments,  $n=5$ . (H-M) Binding displacement isotherms showing the displacement of Nile Red by different antibiotics from its complex with BcnA. Mean of  $n=3$  from a representative of 3 independent experiments. (N) The affinity of  $1.5 \mu\text{M}$  BcnA compared to that of  $1.5 \mu\text{M}$  BcnB to bind  $1.5 \mu\text{M}$  Nile Red,  $n=5$  from 3 independent experiments. \*\*\*  $p < 0.001$  from unpaired two-sided Student's t-test. (O) *In vitro* binding assay of  $1.5 \mu\text{M}$  BcnA to Nile Red in PBS, 3 independent experiments,  $n=5$ . (P and Q) Binding isotherms from the fluorometric assays showing the interaction between BcnA (P) or BcnB (Q) and Nile Red. Mean of  $n=3$  from a representative of 3 independent experiments. (R-T) Nile red binding affinity of BcnA to BODIPY phosphocholine (R and S) and BODIPY phosphoethanolamine (T),  $n=4$  from 2 independent experiments. (U) Binding displacement assays of Nile Red from  $1.5 \mu\text{M}$  BcnA- $1.5 \mu\text{M}$  Nile Red complex by vitamins.  $n=5$  from 3 independent experiments
