# Supplementary material for: Antibiotic Capture by Bacterial Lipocalins Uncovers an Extracellular Mechanism of Intrinsic Antibiotic Resistance
Source: PubMed Central journal article supplement (PMC5350466; doi:10.1128/mbio.00225-17), 2017-03-14
Supplement: mbo002173230sf5.pdf [file mbo002173230sf5.pdf]

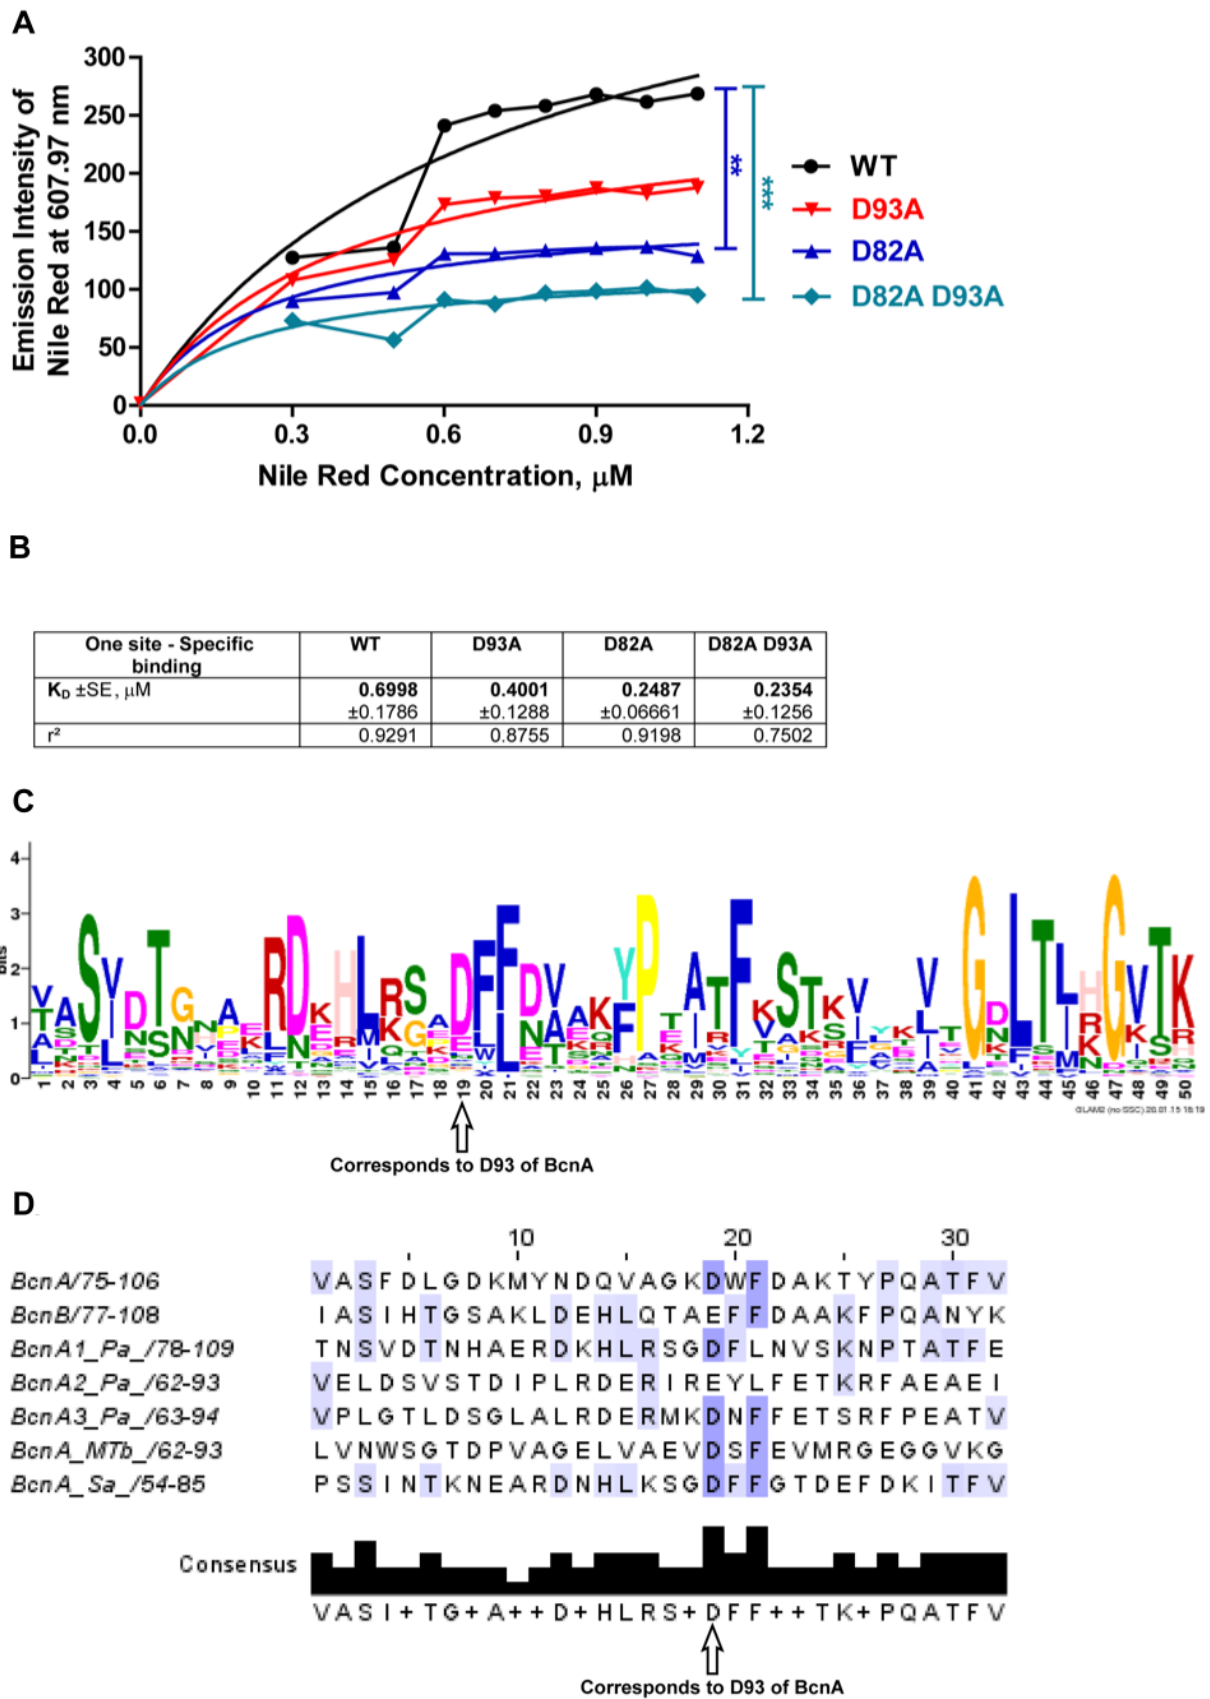

**Fig. S5.** Nile red binding affinity of *B. cenocepacia* BcnA site-directed mutants compared to the wild type, n=4, 2 independent experiments; the smooth lines show the non-linear least square regression analysis of the binding isotherms;

one-way ANOVA (with overall  $p < 0.001$ ) Dunn's Multiple Comparison Test (A-B). (C) Consensus motif of BCN family of proteins. (D) Sequence alignment and consensus motif of BCN homologues used in this study.
