# Supplementary material for: Antibiotic Capture by Bacterial Lipocalins Uncovers an Extracellular Mechanism of Intrinsic Antibiotic Resistance
Source: PubMed Central journal article supplement (PMC5350466; doi:10.1128/mbio.00225-17), 2017-03-14
Supplement: mbo002173230st1.pdf [file mbo002173230st1.pdf]

**Table S1. X-ray crystallography data collection and refinement statistics**

| Parameter                             | BcnA                                                  | BcnB                                                |
|---------------------------------------|-------------------------------------------------------|-----------------------------------------------------|
| <b>Data Collection*</b>               |                                                       |                                                     |
| Resolution Range (Å)                  | 35.9 - 1.4 (1.43 – 1.4)                               | 37.3 - 1.6 (1.63 – 1.6)                             |
| Space Group                           | $P6_1$                                                | $P2_1$                                              |
| Unit cell dimension (Å)               | $a = 93.97, b = 93.97, c = 76.66, \gamma = 120^\circ$ | $a = 51.2, b = 101.2, c = 63.5, \beta = 97.2^\circ$ |
| Unique Reflections                    | 75,559 (4,004)                                        | 82,019 (3,495)                                      |
| Completeness (%)                      | 99.9 (99.4)                                           | 97.3 (78.7)                                         |
| CC1/2                                 | 0.999 (0.829)                                         | 0.997 (0.892)                                       |
| Average $I/\sigma I$                  | 17.1 (3.0)                                            | 11.3 (3.3)                                          |
| Redundancy                            | 10.5 (5.7)                                            | 3.8 (3.1)                                           |
| $R_{merge}$                           | 0.061 (0.492)                                         | 0.056 (0.265)                                       |
| <b>Refinement</b>                     |                                                       |                                                     |
| $R_{work}$ ( $R_{free}$ )             | 0.156 (0.183)                                         | 0.158 (0.192)                                       |
| Number of water molecules             | 274                                                   | 482                                                 |
| Overall $B$ -factor (Å <sup>2</sup> ) | 28.4                                                  | 17.1                                                |
| r.m.s.d.                              |                                                       |                                                     |
| Bond lengths (Å)                      | 0.01                                                  | 0.025                                               |
| Bond angles (°)                       | 1.46                                                  | 2.44                                                |
| Ramachandran Plot (%)                 |                                                       |                                                     |
| In most favorable                     | 96.0                                                  | 96.9                                                |
| In disallowed                         | 0.3                                                   | 0.8                                                 |

\*Data collection statistics in parentheses represent the highest resolution shells. Coordinates for the X-ray crystal structures of BcnA and BcnB have been deposited to the Protein Data Bank with Accession Codes 5IXH and 5IXG, respectively.
