# Supplementary material for: Antibiotic Capture by Bacterial Lipocalins Uncovers an Extracellular Mechanism of Intrinsic Antibiotic Resistance
Source: PubMed Central journal article supplement (PMC5350466; doi:10.1128/mbio.00225-17), 2017-03-14
Supplement: mbo002173230st2.pdf [file mbo002173230st2.pdf]

**Table S2. Strains and Plasmids**

| Strain or plasmid                      | Relevant characteristics <sup>a</sup>                                                                                                                                                                    | Source and/or reference  |
|----------------------------------------|----------------------------------------------------------------------------------------------------------------------------------------------------------------------------------------------------------|--------------------------|
| <b>Strains</b>                         |                                                                                                                                                                                                          |                          |
| <b><i>Burkholderia cenocepacia</i></b> |                                                                                                                                                                                                          |                          |
| K56-2                                  | ET12 clone related to J2315, CF clinical Isolate                                                                                                                                                         | <sup>b</sup> BCRRC, (1)  |
| OME19                                  | K56-2 pSCrhaB2; Tp <sup>R</sup>                                                                                                                                                                          | (2)                      |
| OME37                                  | K56-2 pOE12; BCAL3310 with C-terminus FLAG tag; Tet <sup>R</sup>                                                                                                                                         | This study               |
| OME40                                  | K56-2 pOE13; BCAL3311 with C-terminus FLAG tag; Tet <sup>R</sup>                                                                                                                                         | This study               |
| OME60                                  | K56-2, <i>P</i> <sub>BCAL3310</sub> ::pGSVTp- <i>luxCDABE</i> ; Tp <sup>R</sup>                                                                                                                          | This study               |
| OME61                                  | K56-2, <i>P</i> <sub>BCAL3312-3311</sub> ::pGSVTp- <i>luxCDABE</i> ; Tp <sup>R</sup>                                                                                                                     | This study               |
| OME62                                  | K56-2, ΔBCAL3311                                                                                                                                                                                         | This study               |
| OME65                                  | K56-2, ΔBCAL3310                                                                                                                                                                                         | This study               |
| OME66                                  | K56-2 pDA17; Tet <sup>R</sup>                                                                                                                                                                            | This study               |
| OME71                                  | OME62 pSCrhaB2; Tp <sup>R</sup>                                                                                                                                                                          | This study               |
| OME72                                  | OME62 pOE33 (BCAL3311); Tp <sup>R</sup>                                                                                                                                                                  | This study               |
| OME73                                  | OME62 pOE34 (PA0423); Tp <sup>R</sup>                                                                                                                                                                    | This study               |
| OME74                                  | OME62 pOE35 (PA4340); Tp <sup>R</sup>                                                                                                                                                                    | This study               |
| OME75                                  | OME62 pOE36 (PA4345); Tp <sup>R</sup>                                                                                                                                                                    | This study               |
| OME76                                  | OME62 pOE37 (Rv1890c); Tp <sup>R</sup>                                                                                                                                                                   | This study               |
| OME77                                  | OME62 pOE38 (SAUSA300_2620); Tp <sup>R</sup>                                                                                                                                                             | This study               |
| <b><i>Escherichia coli</i></b>         |                                                                                                                                                                                                          |                          |
| DH5α                                   | F <sup>+</sup> φ80 <i>lacZ</i> M15 <i>endA1 recA1 supE44 hsdR17</i> (r <sub>K</sub> <sup>-</sup> m <sub>K</sub> <sup>+</sup> ) <i>deoR thi-1 nupG supE44 gyrA96relA1</i> Δ( <i>lacZYA-argF</i> )U169, λ- | Laboratory stock         |
| GT115                                  | F <sup>-</sup> <i>mcrA</i> Δ( <i>mrr-hsdRMS-mcrBC</i> ) φ80Δ <i>lacZ</i> ΔM15 Δ <i>lacX74 recA1 rpsL</i> (StrA) <i>endA1</i> Δ <i>dcm uidA</i> (ΔMluI):: <i>pir-116</i> Δ <i>sbcC-sbcD</i>               | Invivogen, San Diego, CA |
| BL21                                   | F <sup>-</sup> <i>dcm ompT hsdS</i> (r <sub>B</sub> <sup>-</sup> m <sub>B</sub> <sup>-</sup> ) <i>gal</i>                                                                                                | Novagen                  |
| <b><i>Pseudomonas aeruginosa</i></b>   |                                                                                                                                                                                                          |                          |
| PAO1                                   | Non-CF clinical isolate                                                                                                                                                                                  | (3)                      |
| Q502                                   | CF clinical isolate                                                                                                                                                                                      | (4)                      |
| <b><i>Salmonella typhi</i></b>         |                                                                                                                                                                                                          |                          |
| SARB63                                 |                                                                                                                                                                                                          | (5)                      |
| <b><i>Shigella flexneri</i></b>        |                                                                                                                                                                                                          |                          |
| SF51571                                | Serotype 1a, antigenic formula 1:4                                                                                                                                                                       | Laboratory stock         |
| <b><i>Acinetobacter</i> species</b>    |                                                                                                                                                                                                          |                          |
| <i>A. baumannii</i> (AB1)              | Clinical isolate                                                                                                                                                                                         | LHSC <sup>c</sup>        |
| <i>A. lwoffii</i> (AB2)                | Clinical isolate                                                                                                                                                                                         | LHSC <sup>c</sup>        |
| <i>A. junii</i> (AB3)                  | Clinical isolate                                                                                                                                                                                         | LHSC <sup>c</sup>        |

***Klebsiella pneumoniae***

|       |                  |                  |
|-------|------------------|------------------|
| Kpn18 | Clinical isolate | Laboratory stock |
|-------|------------------|------------------|

***Staphylococcus aureus***

|        |                         |                |
|--------|-------------------------|----------------|
| USA300 | Community acquired MRSA | Martin McGavin |
|--------|-------------------------|----------------|

**Plasmids**

|                    |                                                                                                                             |                        |
|--------------------|-----------------------------------------------------------------------------------------------------------------------------|------------------------|
| pRK2013            | <i>ori<sub>colE1</sub></i> , RK2 derivative, Kan <sup>R</sup> , <i>mob</i> <sup>+</sup> , <i>tra</i> <sup>+</sup>           | (6)                    |
| pGSVTp- <i>lux</i> | Mobilizable suicide vector containing <i>lux</i> operon, derivative from pGSV3- <i>lux</i> (7); OriT; Tp <sup>R</sup>       | (8)                    |
| pSCrhaB2           | <i>ori<sub>pBBR1</sub></i> <i>rhaR</i> , <i>rhaS</i> , <i>P<sub>rhaB</sub></i> Tp <sup>R</sup> <i>mob</i> <sup>+</sup>      | (9)                    |
| pDAI-SceI-SacB     | <i>ori<sub>pBBR1</sub></i> , Tet <sup>R</sup> , <i>P<sub>dhfr</sub></i> , <i>mob</i> <sup>+</sup> , expressing I-SceI, SacB | (10)                   |
| pGPI-SceI          | <i>ori<sub>R6K</sub></i> , ΩTp <sup>R</sup> , <i>mob</i> <sup>+</sup> , including an I-SceI restriction site                | (11)                   |
| pDA17              | <i>ori<sub>pBBR1</sub></i> , Tet <sup>R</sup> , <i>mob</i> <sup>+</sup> , <i>P<sub>dhfr</sub></i> , FLAG epitope            | D. Aubert, unpublished |
| pOE12              | pDA17, BCAL3310, C-terminus FLAG, Tet <sup>R</sup>                                                                          | This study             |
| pOE13              | pDA17, BCAL3311, C-terminus FLAG, Tet <sup>R</sup>                                                                          | This study             |
| pOE15              | BCAL3310 without signal peptide encoding sequence cloned in pET28a(+)                                                       | (2)                    |
| pOE16              | BCAL3311 without signal peptide encoding sequence cloned in pET28a(+)                                                       | (2)                    |
| pOE22              | <i>P<sub>BCAL3310::luxCDABE</sub></i> transcriptional fusion in pGSVTp- <i>lux</i> , Tp <sup>R</sup>                        | This study             |
| pOE23              | <i>P<sub>BCAL3312-3311::luxCDABE</sub></i> transcriptional fusion in pGSVTp- <i>lux</i> , Tp <sup>R</sup>                   | This study             |
| pOE25              | pGPI-SceI with fragments flanking BCAL3310, Tp <sup>R</sup>                                                                 | This study             |
| pOE26              | pGPI-SceI with fragments flanking BCAL3311, Tp <sup>R</sup>                                                                 | This study             |
| pOE33              | pSCrhaB2, BCAL3311, Tp <sup>R</sup>                                                                                         | This study             |
| pOE34              | pSCrhaB2, PA0423, Tp <sup>R</sup>                                                                                           | This study             |
| pOE35              | pSCrhaB2, PA4340, Tp <sup>R</sup>                                                                                           | This study             |
| pOE36              | pSCrhaB2, PA4345, Tp <sup>R</sup>                                                                                           | This study             |
| pOE37              | pSCrhaB2, Rv1890c, Tp <sup>R</sup>                                                                                          | This study             |
| pOE38              | pSCrhaB2, SAUSA300_2620, Tp <sup>R</sup>                                                                                    | This study             |
| pOE39              | pOE16, D82A                                                                                                                 | This study             |
| pOE41              | pOE16, D93A                                                                                                                 | This study             |
| pOE46              | pOE39, D93A                                                                                                                 | This study             |

<sup>a</sup>Tp<sup>R</sup>, trimethoprim resistance, Kan<sup>R</sup>, kanamycin resistance, Tet<sup>R</sup>, tetracycline resistance.

<sup>b</sup>BCRRC, *B. cepacia* Research and Referral Repository for Canadian CF Clinics.

<sup>c</sup>LHSC, London Health Science Centre, London, Ontario, Canada.

**TABLE REFERENCES**

1. Mahenthalingam E, Coenye T, Chung JW, Speert DP, Govan JR, Taylor P, Vandamme P. 2000. Diagnostically and experimentally useful panel of strains from the *Burkholderia cepacia* complex. J. Clin. Microbiol. **38**:910-913.

2. **El-Halfawy OM, Valvano MA.** 2013. Chemical communication of antibiotic resistance by a highly resistant subpopulation of bacterial cells. *PLoS One* **8**:e68874.
3. **Holloway BW.** 1955. Genetic recombination in *Pseudomonas aeruginosa*. *J Gen Microbiol* **13**:572-581.
4. **Camper N, Glasgow AM, Osbourn M, Quinn DJ, Small DM, McLean DT, Lundy FT, Elborn JS, McNally P, Ingram RJ, Weldon S, Taggart CC.** 2016. A secretory leukocyte protease inhibitor variant with improved activity against lung infection. *Mucosal Immunol* **9**:669-676.
5. **Boyd EF, Wang FS, Beltran P, Plock SA, Nelson K, Selander RK.** 1993. *Salmonella* reference collection B (SARB): strains of 37 serovars of subspecies I. *J Gen Microbiol* **139 Pt 6**:1125-1132.
6. **Figurski DH, Helinski DR.** 1979. Replication of an origin-containing derivative of plasmid RK2 dependent on a plasmid function provided in *trans*. *Proc Natl Acad Sci USA* **76**:1648-1652.
7. **Moore RA, Reckseidler-Zenteno S, Kim H, Nierman W, Yu Y, Tuanyok A, Warawa J, DeShazer D, Woods DE.** 2004. Contribution of gene loss to the pathogenic evolution of *Burkholderia pseudomallei* and *Burkholderia mallei*. *Infect Immun* **72**:4172-4187.
8. **Bernier SP, Nguyen DT, Sokol PA.** 2008. A LysR-type transcriptional regulator in *Burkholderia cenocepacia* influences colony morphology and virulence. *Infect Immun* **76**:38-47.
9. **Cardona ST, Valvano MA.** 2005. An expression vector containing a rhamnose-inducible promoter provides tightly regulated gene expression in *Burkholderia cenocepacia*. *Plasmid* **54**:219-228.
10. **Hamad MA, Skeldon AM, Valvano MA.** 2010. Construction of aminoglycoside-sensitive *Burkholderia cenocepacia* strains for use in studies of intracellular bacteria with the gentamicin protection assay. *Appl Environ Microbiol* **76**:3170-3176.
11. **Flannagan RS, Linn T, Valvano MA.** 2008. A system for the construction of targeted unmarked gene deletions in the genus *Burkholderia*. *Environ. Microbiol.* **10**:1652-1660.
